1 **Knowledge, attitude, and perceptions towards the 2019 Coronavirus Pandemic: A bi-**  
2 **national survey in Africa**

3  
4  
5 Elnadi Hager<sup>1</sup>, Ismail A. Odetokun<sup>2</sup>, Obasanjo Bolarinwa<sup>3</sup>, Ahmed Zainab<sup>4</sup>, Ocholor  
6 Okechukwu<sup>5</sup>, Al-Mustapha A. Ibrahim<sup>6,7\*</sup>

7 <sup>1</sup>Infectiologie et Santé Publique, Institut National de la Recherche Agronomique, Nouzilly,  
8 France.

9 <sup>2</sup>Department of Veterinary Public Health and Preventive Medicine, Faculty of Veterinary  
10 Medicine, University of Ilorin, Kwara State, Nigeria.

11 <sup>3</sup>School of Nursing & Public Health Medicine, College of Health Sciences, University of  
12 KwaZulu - Natal, Durban, South Africa.

13 <sup>4</sup>Department of Veterinary Microbiology, Faculty of Veterinary Medicine, Cairo University,  
14 Egypt.

15 <sup>5</sup>Department of Global Health, Unit of Functional Genetics of Infectious Diseases, Institute  
16 Pasteur, France.

17 <sup>6</sup>Department of Food Hygiene and Environmental Health, Faculty of Veterinary Medicine,  
18 University of Helsinki, Finland.

19 <sup>7</sup>Department of Veterinary Services, Kwara State Ministry of Agriculture and Rural  
20 Development, Ilorin, Nigeria.

21

22 \*Corresponding author:

23 Al-Mustapha, Ahmad Ibrahim

24 [ahmad.al-mustapha@helsinki.fi](mailto:ahmad.al-mustapha@helsinki.fi) (AAI)

25

26

27 **Abstract**

28 The current Coronavirus (COVID-19) pandemic has changed and impacted lives on a global  
29 scale since its emergence and spread from China in late 2019. It has caused millions of  
30 infections, and thousands of deaths worldwide. However, the control of this pandemic still  
31 remains unachievable in many African countries including Egypt and Nigeria, despite the  
32 application of some strict preventive and control measures. Therefore, this study assessed the  
33 knowledge, attitude and perceptions of Egyptians and Nigerians towards COVID-19  
34 pandemic.

35 A total of 1437 respondents were included in this preliminary cross-sectional survey. The  
36 mean knowledge score was  $14.7 \pm 2.3$ . The majority of the respondents (61.6%) had a  
37 satisfactory knowledge of the disease. Age (18-39 years), education (College/bachelors) and  
38 background of respondents were factors influencing knowledge levels. The attitude of most  
39 respondents (68.9%) towards the preventive measures was satisfactory with an average  
40 attitude score of  $6.9 \pm 1.2$ . The majority of the respondents (96%) practiced self-isolation and  
41 social-distancing but only 36% follow all health recommendations. The perception of most  
42 respondents (62.1%) on the global efforts at controlling the virus and preventing further  
43 spread was satisfactory with an average score of  $10.9 \pm 2.7$ . A satisfactory knowledge of  
44 COVID-19 was significantly associated with good attitude and perceptions ( $p < 0.001$ ) of  
45 respondents. Only 22% of the respondents were satisfied with their country's handling of the  
46 pandemic.

47 It is imperative that to avoid Africa being the next epicenter of the pandemic. Governments  
48 need to strengthen health systems, improve their surveillance activities in detecting cases, and  
49 effectively apply standard infection prevention and control measures.

50 **Keywords:** Knowledge; attitude; perception; COVID-19; Nigeria; Egypt.

## 51 **Introduction**

52 The World Health Organization (WHO), on December 31, 2019, received a report of the  
53 presence of unknown causes of pneumonia disease in Wuhan, China (1). Later, this disease  
54 was defined as a novel Coronavirus disease and further declared as a public health emergency  
55 of international concern by January 30, 2020 (2). The novel virus was renamed by the  
56 International Committee on Taxonomy of Viruses, as severe acute respiratory syndrome  
57 coronavirus 2 (SARS-CoV-2) that causes the 2019 Coronavirus disease (COVID-19) (3; 4).  
58 COVID-19 is caused by a single stranded RNA virus belonging to the Coronaviridae family  
59 (5). This disease is similar to the previously emerged SARS-CoV and the Middle East  
60 respiratory syndrome Coronavirus (MERS-CoV) (6). Still, unlike these, its outbreaks have  
61 taken a global pandemic course. Since the first report of the confirmed cases of the COVID-19  
62 in Wuhan, China (1;7), the world has witnessed severe unprecedented mortality and morbidity  
63 due to this disease resulting in serious public health emergencies. Infection by SARS-CoV-2  
64 in humans occurs mainly through air droplets, close contact with infected persons, especially  
65 mucus membranes secretions from nose, mouth, or eyes, contaminated surfaces and some  
66 studies suggest digestive tract transmission (8; 9).

67 Despite the level of advancement in health systems in developed countries like the United  
68 States, the United Kingdom, France, Italy, and Spain, they appeared to be the worst hit with  
69 the epidemic curves still rising (10). No proven treatments or vaccines are available to control  
70 COVID-19 and thus pose a significant threat to health care delivery. To flatten the curves, most  
71 nations, including African countries, have applied strict prevention and control measurements  
72 to curb the disease including regulations such as general lockdown, obligatory home  
73 quarantine, ban on public gatherings, international flights restrictions and raising awareness on  
74 proper hand wash, hygiene and sanitation as well as social distancing (11).

75 The rate of infection due to COVID-19 on the African continent is on the increase, especially  
76 in Egypt in the north and Nigeria in the west. As of May 14, there were 72,336 confirmed cases,  
77 2475 deaths, and 25,270 recoveries due to COVID-19 in Africa (12), with approximately 22%  
78 of these cases from Egypt and Nigeria alone. To stop this pandemic, it is imperative to institute  
79 effective infection prevention and control practices globally, nationally, and at the community  
80 level. Consequently, it is urgent to understand the public knowledge, reactions, adherence to,  
81 and acceptance of such measures that affect their daily life in several ways, especially  
82 psychologically, socially, and physically. This could be achieved through knowledge, attitude,  
83 and practice (KAP) studies. The information generated from such studies, in addition to  
84 comprehensive reviews and recommendations, could help in the fight against COVID-19 and  
85 similar future threats (13; 14).

86 In this study, we investigated the public response from two African countries (Egypt and  
87 Nigeria), towards the COVID-19 outbreak. This is a first report on the knowledge, attitude, and  
88 perceptions of participants with a scope covering more than one African country. Findings from  
89 this study would contribute to the global efforts to control the COVID-19 pandemic.

## 90 **Materials and Methods**

### 91 *Study design*

92 This study was conducted in April 2020 using an online cross - sectional survey of respondents  
93 from two African countries – Egypt and Nigeria. Egypt and Nigeria currently rank high in the  
94 number of confirmed cases for COVID-19 from the northern and western regions of Africa  
95 respectively.

### 96 *Study participants, sample size and sampling*

97 The targeted respondents from both countries include adults >17 years of all educational  
98 levels, including both medical and non-medical backgrounds. To calculate the sample size for

99 this survey, we hypothesized that the percentage frequency of outcome factor in the  
100 population ( $p$ ) is 50% with a design effect of 1 at a confidence level of 99.9%. A sample size  
101 of 1083 was calculated using the Open Source Epidemiologic Statistics for Public Health  
102 (OpenEpi), v.3.01 (updated 2013/04/06). To make up for non-response, 30% non-  
103 contingency was added. Thus, a minimum of 1,408 were targeted to be obtained from both  
104 countries. Since, Nigeria has a population more than twice of Egypt, the respondents were  
105 sampled in at least a ratio of 1 (Egypt) : 3 (Nigeria). A preliminary analysis of 1,437  
106 respondents (Nigeria - 1,132; Egypt - 305), recruited using a convenient sampling method,  
107 was conducted to assess their knowledge, attitude, and perceptions towards the pandemic.  
108 The online survey was carried out between April and May 2020. Due to the spread of the  
109 COVID-19 pandemic and the lockdown policy enforced in both countries, respondents were  
110 reached via emails and social media platforms such as WhatsApp and Facebook messenger  
111 simultaneously in both countries. Initially, respondents from major cities, Lagos/Ilorin  
112 (Nigeria) and Cairo/Alexandria (Egypt) were recruited before the questionnaire  
113 administration spread to participants from other major cities and towns across the two  
114 countries. The online web-based survey was anonymous and administered in the official  
115 languages (Arabic and English) of both countries.

#### 116 *Ethical considerations*

117 The Kwara State Ministry of Education, Ilorin, Nigeria (reference number:  
118 DE/PRIM/96/VOL.1/130) granted approval for the conduct of this study. This approval  
119 suffices for the surveys in both countries. Participation was anonymous and voluntary.  
120 Informed consent was sought from the respondents and participants could withdraw from the  
121 survey at any time in line with stipulations of the World Medical Association Declaration of  
122 Helsinki Ethical principles (15).

123 *Questionnaire design*

124 We designed a structured questionnaire using google forms (Alphabet Inc., California, USA).  
125 The survey tool is available online (<https://forms.gle/h649kakEzLAXcpYo7>). The  
126 questionnaire was pre-validated by three independent reviewers, and a pre-test study was  
127 conducted with 20 respondents from Nigeria. The responses from the pre-test were not included  
128 in the analyzed data but used to improve upon the quality of the questionnaire. The  
129 questionnaire consisted of 5 parts: a). Demography of respondents, b). Knowledge of  
130 Coronavirus (COVID-19), c). Attitude towards preventive measures, d). Perception of global  
131 response, and e). Community response to the pandemic. The survey was designed as a quiz.  
132 We provided the correct answers to all questions wrongly answered by the respondents as a  
133 feedback. All questions and responses were based on the latest recommendations by the WHO  
134 (1; 3). Section B tested their knowledge of/focused on disease spread, symptoms, incubation  
135 period, and how to limit infection. Section C evaluated their attitude towards preventive  
136 measures by focusing on questions related to hand hygiene, wearing face masks, and social  
137 distancing. Sections D and E assessed their perception of global and community response  
138 efforts to the pandemic with particular emphasis on ways to prevent future occurrence of such  
139 outbreaks.

140 *Data analysis*

141 Data were summarized using Microsoft Excel 2019 and analyzed utilizing the Statistical  
142 Package for the Social Sciences (SPSS) software, v.22, and the OpenEpi. To summarize the  
143 obtained data, the demographic characteristics of respondents were subjected to descriptive  
144 statistics (frequency and proportions). To assess knowledge, attitude, and perception levels of  
145 respondents, a numeric scoring pattern was used, and outcome (dependent) variables –  
146 knowledge, attitude, and perception – were computed (16). These outcome variables were

147 further categorized as binary (satisfactory or unsatisfactory) based on cut-off (mean scores)  
 148 marks (Table 1). Respondents receiving scores greater than the mean scores for knowledge  
 149 (14.7±2.3), attitude (6.9 ± 1.2), and perception (10.9 ± 2.7) were deemed to be satisfactory  
 150 responses and vice versa. Chi-square test was used to test for association between independent  
 151 variables (demographics) and outcome variables (knowledge, attitude and perception) at a 95%  
 152 confidence interval with significant variables ( $p < 0.05$ ) subjected to a logistic regression  
 153 model.

## 154 **Results**

### 155 *Respondent demographics*

156 A total of 1437 respondents were included in this preliminary survey. Most respondents  
 157 (83.3%,  $n = 1197/1437$ ) were between the ages of 18 - 39 years. Similarly, the majority of the  
 158 respondents (84.9%,  $n = 1220/1437$ ) has a bachelor/master's degree (Table 2). Respondents  
 159 with a scientific/medical background accounted for 59.3% of the responses ( $n = 852/1437$ ).

160 Table 1: Description of scores obtained by respondents ( $n = 1437$ )

| Outcome variables | Maximum obtainable scores | Scores received by respondents |               | Mean ± SD  | Satisfactory n (%) | Unsatisfactory n (%) |
|-------------------|---------------------------|--------------------------------|---------------|------------|--------------------|----------------------|
|                   |                           | Minimum score                  | Maximum score |            |                    |                      |
| Knowledge         | 20                        | 5                              | 18            | 14.7±2.3   | 885 (61.6)         | 552 (38.4)           |
| Attitude          | 9                         | 2                              | 9             | 6.9 ± 1.2  | 990 (68.9)         | 447 (31.1)           |
| Perception        | 17                        | 1                              | 16            | 10.9 ± 2.7 | 892 (62.1)         | 545 (37.9)           |

161 Cut-off marks = mean scores; Satisfactory scores = scores > mean score obtained by  
 162 respondents; SD - standard deviation.

163

164

165 Table 2: Demographics of respondents from Nigeria and Egypt used in this preliminary study  
 166 (n = 1437).

| Variable                   | Number of respondents (%) |
|----------------------------|---------------------------|
| <b>Age (years)</b>         |                           |
| 18 – 29                    | 706 (49.1)                |
| 30 – 39                    | 491 (34.2)                |
| 40 – 49                    | 168 (11.7)                |
| 50 – 59                    | 51 (3.5)                  |
| 60 – 69                    | 20 (1.4)                  |
| >69                        | 1 (0.1)                   |
| <b>Gender</b>              |                           |
| Male                       | 754 (52.5)                |
| Female                     | 677 (47.1)                |
| Prefer not to say          | 6 (0.4)                   |
| <b>Education</b>           |                           |
| No formal education        | 2 (0.1)                   |
| High School                | 60 (4.2)                  |
| College (Bachelor)         | 897 (62.4)                |
| Masters                    | 323 (22.5)                |
| Ph.D.                      | 91 (6.3)                  |
| Others                     | 64 (4.5)                  |
| <b>Background</b>          |                           |
| Non-Scientific/Non-Medical | 585 (40.7)                |
| Scientific/Medical         | 852 (59.3)                |
| <b>Nationality</b>         |                           |
| Nigeria                    | 1132 (78.8)               |
| Egypt                      | 305 (21.2)                |

167 % - percentage.

168 *Knowledge, attitude and perception of respondents towards COVID-19*

169 Knowledge

170 The mean knowledge score was  $14.7 \pm 2.3$ , from a maximum obtainable score of 20 (Table 1).

171 Most respondents (61.6%, n = 885/1437) had satisfactory knowledge of the disease, and the  
 172 internet was the main source of information for most respondents (83.7%, n = 1204/1437).

173 Moreover, most (78%, n = 1127/1437) of the respondents knew that COVID-19 was different  
 174 from common cold. The majority of the respondents knew that it is possible to have  
 175 asymptomatic COVID-19 positive patients. Most respondents also knew that most symptoms  
 176 appear between 1-14 days. Most respondents also correctly identified several symptoms of



177 COVID-19, knew how to kill (inactivate) the virus, and recognized the importance of handwash  
178 in reducing the chances of contracting the disease (Table s1). All of the independent variables  
179 (age, gender, level of education, background, and nationality) were significantly ( $p < 0.05$ )  
180 associated with the knowledge of respondents about COVID-19.

#### 181 Attitude

182 The participants attitude towards COVID-19 was satisfactory as the mean attitude score was  
183  $6.9 \pm 1.2$ , with a range of 2 to 9 (Table1). Most of the respondents (68.9%,  $n = 990/1437$ ) had  
184 a positive attitude towards protective measures being advised by the WHO or their local health  
185 authorities (Table 1). Most respondents (>80%) valued the importance of proper hygiene, self  
186 - isolation, the use of face mask when going out, and the ideal distance between two people in  
187 curbing the spread of the virus (Table s2). Some of the respondents were bored, fearful, and  
188 anxious to return to the "new normal." Due to the compulsory lockdown, which has psycho -  
189 socially affected the lifestyle of most Nigerians and Egyptians, people have adapted by  
190 following the social media platforms (84%,  $n = 1207/1437$ ), among other means of changing.

#### 191 Perception

192 Respondents (62.1%,  $n = 892/1437$ ) had a positive perception of global efforts to control the  
193 pandemic (Table 1). Although most of the respondents (81%,  $n = 1163/1437$ ) agreed with the  
194 compulsory lockdown to prevent the further spread of the disease, only 38.6% ( $n = 554/1437$ )  
195 believe that the government had done enough to protect its citizens. Most respondents (77%,  $n$   
196  $= 1110/1437$ ) rated their country's national COVID-19 response plan below average (1-3 on a  
197 scale of 5) (Table s3).

198 The satisfactory knowledge of the respondents had a positive impact ( $p < 0.001$ ) on their  
199 attitudes towards preventive measures and their perception of a community response to curb  
200 the spread of the virus (Table 3). Most respondents (>81%,  $n = 1163/1437$ ) agreed that

201 improved personal hygiene, reducing social contacts, and following their countries health  
 202 recommendations are necessary to reduce disease burden and reduce person to person  
 203 transmission. The majority of the respondents (66%, n = 945/1437) believed that we can  
 204 prevent a future pandemic by reducing international travels (33%, n = 472/1437); establishing  
 205 improved early alerts and global warning systems for infectious diseases (82%, n = 1175/1437)  
 206 and improving disease surveillance in both human and animal health sectors (73%, n =  
 207 1044/1437) (Table s4).

208 Table 3: Test of association (Fischer's exact test) between knowledge, attitude, and perception  
 209 of respondents from Nigeria and Egypt (n = 1437).

|           |                | Attitude   |            | $\chi^2$ | DF    | p - value |        |
|-----------|----------------|------------|------------|----------|-------|-----------|--------|
|           |                | Good (%)   | Poor (%)   |          |       |           |        |
| Knowledge | Satisfactory   | 658 (45.8) | 227 (15.8) | 31.98    | 1     | <0.001    |        |
|           | Unsatisfactory | 332 (23.1) | 220 (15.3) |          |       |           |        |
|           |                |            | Perception |          | 38.66 | 1         | <0.001 |
|           | Satisfactory   | 605 (42.1) | 280 (19.5) |          |       |           |        |
|           | Unsatisfactory | 287 (19.9) | 265 (18.4) |          |       |           |        |

210  $\chi^2$ - chi-square; DF- degree of freedom.

211 *Demographic factors influence Knowledge, attitude and perception of respondents on COVID-*  
 212 *19*

213 Respondents within the 18 - 29 years age range were 1.4× (95%CI: 0.55 - 0.89; p = 0.004)  
 214 more likely to be knowledgeable than other age groups. Respondents with a high school  
 215 education were at least 4.7× (95% CI: 0.15 - 144.7; p = 0.73) more likely to have satisfactory  
 216 knowledge about COVID-19 than those with no formal education. As expected, respondents  
 217 with scientific or medical backgrounds were 1.4× (95% CI: 0.56 - 0.86; p < 0.001) more likely  
 218 to be knowledgeable than those with non-scientific/non-medical background. Egyptians were  
 219 1.8× (95%CI: 0.43 - 0.74; p < 0.001) more likely to have more satisfactory knowledge than  
 220 Nigerians (Table 4).

221 The age, gender, level of education, background, and nationality had a significant impact on  
222 the attitude towards COVID-19. The older the respondents, the better their attitude towards the  
223 disease with an odds ratio ranging from 1.34 (95% CI: 1.06 – 1.74;  $p = 0.019$ ) to 6.65 (95%  
224 CI: 0.17 – 206.9;  $p = 0.692$ ). Female respondents were 1.59× (95% CI: 1.27 - 1.99;  $p < 0.001$ ),  
225 more likely to have a positive attitude towards COVID-19 than males. Respondents of  
226 scientific/medical background were 1.6× (95% CI: 0.49 - 0.78;  $p < 0.001$ ) more likely to have  
227 better attitude than those with non-scientific/non-medical background. Nigerians were 11×  
228 (95% CI: 7.57 - 13.47;  $p < 0.001$ ) more likely to have a positive attitude than Egyptians (Table  
229 5).

230 The level of education, background, and nationality greatly affected the perception of global  
231 and community response to curbing the spread of COVID-19 and preventing the occurrence of  
232 any future pandemic. Educated respondents were 2.58 (95% CI: 0.09 -77.55;  $p > 0.999$ ) to 6.54  
233 (95% CI: 0.21 - 202.40;  $p = 0.543$ ), more likely to have positive perceptions of the global  
234 responses than non-educated respondents. Similar to the attitude, scientific/medical  
235 respondents were 1.6× (95% CI: 0.56 - 0.87;  $p < 0.001$ ) more likely to have better perceptions  
236 of the global responses than those with non-scientific/non-medical background (Table 6).

237

238

239

240

241

242

243

244

245

246 Table 4. Analysis of demographic characteristics as factors influencing the knowledge levels of poultry farmers on antimicrobial in Kwara state.

| Variables                          | Satisfactory (%) | Unsatisfactory (%) | p- value ( $\chi^2$ ) | OR   | 95% CI        | p-value |
|------------------------------------|------------------|--------------------|-----------------------|------|---------------|---------|
| <b>Age (years)</b>                 |                  |                    |                       |      |               |         |
| 18 - 29                            | 406 (45.87)      | 300 (54.34)        | 0.021                 | 1.00 | -             | -       |
| 30 - 39                            | 324 (36.61)      | 167 (30.25)        |                       | 0.69 | 0.55 - 0.89   | 0.004   |
| 40 - 49                            | 107 (12.09)      | 61 (11.05)         |                       | 0.77 | 0.54 - 1.09   | 0.168   |
| 50 - 59                            | 33 (3.72)        | 18 (3.26)          |                       | 0.74 | 0.41 - 1.34   | 0.392   |
| 60 - 69                            | 15 (1.69)        | 5 (0.90)           |                       | 0.45 | 0.16 - 1.26   | 0.178   |
| >69                                | 0 (0.00)         | 1 (0.18)           |                       | 3.38 | 0.09 - 132.70 | >0.999  |
| <b>Gender</b>                      |                  |                    |                       |      |               |         |
| Male                               | 445 (50.29)      | 309 (55.97)        | 0.032                 | 1    | -             | -       |
| Female                             | 438 (49.49)      | 239 (42.90)        |                       | 0.79 | 0.63 - 0.97   | 0.031   |
| Prefer not to say                  | 2 (0.22)         | 4 (0.73)           |                       | 2.88 | 0.52 - 15.82  | 0.390   |
| <b>Education</b>                   |                  |                    |                       |      |               |         |
| No formal education                | 2 (0.22)         | 0 (0.00)           | 0.028                 | 1.00 | -             | -       |
| High School                        | 31 (3.50)        | 29 (5.25)          |                       | 4.68 | 0.15 - 144.70 | 0.727   |
| College (Bachelor)                 | 537 (60.67)      | 360 (62.51)        |                       | 5.04 | 0.17 - 150.70 | 0.659   |
| Masters                            | 219 (24.74)      | 104 (18.84)        |                       | 2.37 | 0.08 - 71.33  | >0.999  |
| Ph.D.                              | 61 (6.89)        | 30 (5.43)          |                       | 2.46 | 0.08 - 75.36  | >0.999  |
| Others                             | 35 (3.95)        | 29 (5.25)          |                       | 4.14 | 0.13 - 127.90 | 0.796   |
| <b>Background</b>                  |                  |                    |                       |      |               |         |
| Non - Scientific/<br>Non - Medical | 330 (37.28)      | 255 (46.19)        | 0.001                 | 1.00 | -             | -       |
| Scientific/Medical                 | 555 (62.72)      | 297 (53.81)        |                       | 0.69 | 0.56 - 0.86   | 0.001   |
| <b>Nationality</b>                 |                  |                    |                       |      |               |         |
| Egypt                              | 219 (24.74)      | 86 (15.57)         |                       | 1.00 | -             | -       |
| Nigeria                            | 666 (75.26)      | 466 (84.43)        |                       | 1.78 | 1.35, 2.35    | <0.001  |

247  $\chi^2$  - chi square; DF - degree of freedom; OR - odds ratio; CI: confidence interval;

249 Table 5. Analysis of demographic characteristics as factors influencing the attitude of respondents from Nigeria and Egypt towards COVID-19  
 250 pandemic.

| Independent variables              | Satisfactory (%) | Unsatisfactory (%) | P - value ( $\chi^2$ ) | OR   | 95% CI        | P - value |
|------------------------------------|------------------|--------------------|------------------------|------|---------------|-----------|
| <b>Age</b>                         |                  |                    |                        |      |               |           |
| 18 - 29                            | 513 (51.81)      | 193 (43.17)        | 0.002                  | 1.00 | -             | -         |
| 30 - 39                            | 325 (32.82)      | 166 (37.13)        |                        | 1.34 | 1.06 - 1.74   | 0.019     |
| 40 - 49                            | 99 (10)          | 69 (15.43)         |                        | 1.85 | 1.31 - 2.63   | <0.001    |
| 50 - 59                            | 40 (4.04)        | 11 (2.46)          |                        | 0.73 | 0.368 - 1.45  | 0.470     |
| 60 - 69                            | 13 (1.31)        | 7 (1.56)           |                        | 3.48 | 1.66 - 7.29   | 0.002     |
| >69                                | 0 (0.00)         | 1 (0.22)           |                        | 6.65 | 0.17 - 260.90 | 0.692     |
| <b>Gender</b>                      |                  |                    |                        |      |               |           |
| Male                               | 555 (56.06)      | 199 (44.52)        | <0.001                 | 1.00 | -             | -         |
| Female                             | 431 (43.53)      | 246 (55.03)        |                        | 1.59 | 1.27 - 1.99   | <0.001    |
| *Prefer not to say                 | 4 (0.40)         | 2 (0.45)           |                        | -    | -             | -         |
| <b>Education</b>                   |                  |                    |                        |      |               |           |
| No formal education                | 0 (0.00)         | 2 (0.44)           | 0.045                  | 1.00 | -             | -         |
| High School                        | 36 (3.63)        | 24 (5.37)          |                        | 0.13 | 0.004 - 4.13  | 0.2504    |
| College (Bachelor)                 | 637 (64.34)      | 260 (58.16)        |                        | 0.08 | 0.003 - 2.44  | 0.1186    |
| Masters                            | 219 (22.12)      | 104 (23.26)        |                        | 0.09 | 0.003 - 2.85  | 0.1501    |
| Ph.D.                              | 56 (5.65)        | 35 (7.82)          |                        | 0.13 | 0.004 - 3.82  | 0.2265    |
| Others                             | 42 (4.24)        | 22 (4.92)          |                        | 0.10 | 0.003 - 3.25  | 0.1813    |
| <b>Background</b>                  |                  |                    |                        |      |               |           |
| Non - Scientific/<br>Non - Medical | 367 (37.07)      | 218 (48.76)        | <0.001                 | 1.00 | -             | -         |
| Scientific/Medical                 | 623 (62.92)      | 229 (51.24)        |                        | 0.62 | 0.49 - 0.78   | <0.001    |
| <b>Nationality</b>                 |                  |                    |                        |      |               |           |
| Egypt                              | 86 (8.68)        | 219 (48.99)        | <0.001                 | 1.00 | -             | -         |
| Nigeria                            | 904 (91.32)      | 228 (51.11)        |                        | 0.09 | 0.07, 0.13    | <0.001    |

251  $\chi^2$  - chi square; DF - degree of freedom; OR - odds ratio; CI: confidence interval; \* - excluded from the multivariable logistic regression analysis

252 Table 6. Analysis of demographic characteristics as factors influencing the perceptions of respondents from Nigeria and Egypt towards COVID-  
 253 19 pandemic.

| Independent variables              | Satisfactory (%) | Unsatisfactory (%) | p -value ( $\chi^2$ ) | OR   | 95%CI         | p -value |
|------------------------------------|------------------|--------------------|-----------------------|------|---------------|----------|
| <b>Age</b>                         |                  |                    |                       |      |               |          |
| 18 - 29                            | 439 (49.21)      | 267 (48.99)        | 0.888                 | -    | -             | -        |
| 30 - 39                            | 301 (33.74)      | 190 (34.86)        |                       | -    | -             | -        |
| 40 - 49                            | 104 (11.65)      | 64 (11.74)         |                       | -    | -             | -        |
| 50 - 59                            | 35 (3.92)        | 16 (2.93)          |                       | -    | -             | -        |
| 60 - 69                            | 12 (1.31)        | 8 (1.47)           |                       | -    | -             | -        |
| >69                                | 1 (0.11)         | 0 (0.00)           |                       | -    | -             | -        |
| <b>Gender</b>                      |                  |                    |                       |      |               |          |
| Male                               | 473 (53.02)      | 281 (51.55)        | 0.732                 | -    | -             | -        |
| Female                             | 416 (46.63)      | 261 (47.88)        |                       | -    | -             | -        |
| Prefer not to say                  | 3 (0.33)         | 3 (0.55)           |                       | -    | -             | -        |
| <b>Education</b>                   |                  |                    |                       |      |               |          |
| No formal education                | 2 (0.22)         | 0 (0.00)           | 0.03                  | 1.00 | -             | -        |
| High School                        | 26 (2.91)        | 34 (6.23)          |                       | 6.54 | 0.21 - 202.40 | 0.543    |
| College (Bachelor)                 | 553 (61.99)      | 344 (63.11)        |                       | 3.11 | 0.10 - 92.94  | 0.95     |
| Masters                            | 213 (23.87)      | 110 (20.18)        |                       | 2.58 | 0.09 - 77.55  | >0.9999  |
| Ph.D.                              | 57 (6.39)        | 34 (6.23)          |                       | 2.98 | 0.09 - 91.26  | 0.984    |
| Others                             | 41(4.59)         | 23 (4.22)          |                       | 2.81 | 0.09 - 86.84  | >0.999   |
| <b>Background</b>                  |                  |                    |                       |      |               |          |
| Non - Scientific/<br>Non - Medical | 334 (37.44)      | 251(46.05)         | 0.001                 | 1.00 | -             | -        |
| Scientific/Medical                 | 558 (62.56)      | 294 (53.95)        |                       | 0.69 | 0.56 - 0.87   | 0.001    |
| <b>Nationality</b>                 |                  |                    |                       |      |               |          |
| Egypt                              | 165 (18.49)      | 140 (25.68)        | 0.001                 | 1.00 | -             | -        |
| Nigeria                            | 727 (81.51)      | 405 (74.32)        |                       | 0.66 | 0.51 - 0.85   | 0.002    |

254  $\chi^2$  - chi square; DF - degree of freedom; OR - odds ratio; CI: confidence interval.

## Discussion

To the best of our knowledge, this research is one of the first studies examining the knowledge, attitude, and perceptions (KAP) toward COVID-19 in two of the most populated countries in Africa, Nigeria, and Egypt. Both countries announced the occurrence of their first COVID-19 cases in February, 2020 (12; 17; 18). Since then, the number of cases has increased with over 22,000 confirmed cases and over 900 deaths (10; 12).

Most of the respondents (62%) had a satisfactory knowledge level of the disease and the preventive measures against it. This is because both countries have a well - educated population (bachelor/master's degree holders), mostly between 18 to 39 years (83%), and an average knowledge score of 74% indicated that most respondents were knowledgeable on COVID-19. It is also possible that the seriousness of the global pandemic in addition to daily updated from public health agencies in respective countries would have prompted the need to learn and acquire knowledge on COVID-19. However, this score is lower to the previous KAP studies on COVID-19 in China and Iran in which participants had an overall knowledge score of 90% (13; 19)

The internet (social media platforms- 84%) and TV (44%) were the main source of information for the participants. This is similar to the report by Abdelhafiz AS, et al. (20) where Facebook was the main source of information for young adults in their survey in Egypt. The internet (social media platforms) and TV had proved helpful for respondents to adapt with the physical social restraints during the COVID-19 compulsory lockdown in Nigeria and Egypt. In addition, almost half of our respondents (49%) were very satisfied with the social media coverage of the pandemic. This is lower than the 67% satisfaction rating of the social media coverage reported in Egypt (20). On the contrary, Roy et al. (21)

278 reported 67% of Indians felt worried after receiving social media updates on the global  
279 burden of COVID-19.

280 The significant associations ( $p < 0.05$ ) observed in this study between age, education,  
281 nationality, and background and the knowledge score of COVID-19 (Table 4) were similar  
282 to reports from other KAP studies from China, Egypt, and India in which participants who  
283 were well educated, young age or with high socioeconomic level had better knowledge of  
284 COVID-19 than the others (13; 20; 21).

285 Although this study was conducted during the compulsory lockdown in both countries, the  
286 optimistic attitude of Egyptians and Nigerian could be seen in a mean attitude score of  $6.9$   
287  $\pm 1.2$ . Most (67%) of the respondents had generally satisfactory attitudes, recognizing the  
288 importance of social distancing (96%), and following the health recommendations (92.5%).  
289 However, only 36% followed all the recommendations. This might be due to the severe  
290 economic hardship faced by the citizens of both countries associated with workers who need  
291 to earn their daily wages, and poor government palliative plans for the citizens. This is  
292 further buttressed by the fact that only 39% of the respondents were convinced that their  
293 governments have done enough to curb the spread of the SARS-CoV-2. This distrust in the  
294 management of the pandemic might also be due to the low testing capability, and lack of  
295 strict enforcement of the compulsory lockdown. More so, in many African countries, reports  
296 of porous borders, congested cities, increased hunger and poverty, poor health literacy, and  
297 expensive face masks and hand sanitizers have all been obstacles against control measures  
298 (Lucero - Priso DE, et al., 2020).

299 All of the respondents agreed on the importance of handwashing and other preventive  
300 measures in reducing the chances of being infected. A similar positive attitude towards most  
301 preventive measures were earlier reported in India (21) and Egypt (20) but the later noted



302 some reluctance in following some recommendations such as the use of a face mask. In  
303 another study conducted in China, most of the participants followed the health  
304 recommendations and less than 4% went to crowded places or went outside without a  
305 facemask. Chinese were also optimistic about the success of their COVID-19 control  
306 program (13). In our study, 96% of respondents considered self-isolation essential and  
307 effective, hence avoiding places with confirmed COVID-19 cases. This finding may support  
308 the lower number of recorded cases initially observed in Egypt and Nigeria. Comparably,  
309 in a KAP study conducted by Chan et al. (2015) on the H7N9 influenza pandemic, most  
310 respondents did not take the seasonal influenza as serious as 42.3% of the respondents did  
311 not avoid going to places that had the H7N9 confirmed cases.

312 While some participants were bored (52%), nervous/anxious (47%), afraid (44%) and  
313 stressed (30%). Others felt optimistic (18%) and happy (1.4%). Sixty - six (66%) of  
314 Nigerians and Egyptians were highly optimistic that collectively, the world can reduce the  
315 impact or prevent the occurrence of a similar future pandemic. This attitude is encouraging  
316 as it would facilitate eventual control of the pandemic.

317 Only 25.4% of the respondents were not satisfied with the WHO's handling of the global  
318 pandemic. This high rating of the WHO's efforts at coordinating global health might be  
319 attributed to the daily disease burden updates, press conferences, provision of authentic  
320 information, travel advise, and support for the health authorities of both countries.

321 It was remarkable that most of the participants acknowledged the importance of in-depth  
322 scientific research in areas of vaccines and diagnostics; and the need for increased multi -  
323 sectoral collaborations (on human, animal and environmental health) using the one health  
324 approach as measures that can help prevent the occurrence of a future pandemic.

325 The major limitations of this study were the low internet penetration rate in Nigeria (42%)  
326 and Egypt (54%); in which a significant proportion of the population could not gain access  
327 to this online survey. This, coupled with the lockdown limited the sample size of this  
328 preliminary study to 1437 (Nigeria - 1132 and Egypt - 305). A more encompassing global  
329 survey is currently being undertaken. Also, the data was skewed in favor of young  
330 respondents (18 - 39 years) due to their profound interest in social media. Our results cannot  
331 be generalized for Africa as a whole as each country had specific measures and peculiarities  
332 with regards to controlling the pandemic. For example, in Nigeria and Egypt, not all states  
333 have closed their borders, permitting the free movement of people across states.

### 334 **Conclusion**

335 The COVID-19 pandemic has profound medical, economic, and psycho-social effects, with  
336 over 300,000 lives lost globally. Assessing the KAP of respondents and further education  
337 of the general public has proved effective in changing risk perception of the populace and  
338 resulted in attitudinal changes that were necessary to reduce the epidemic disease burden  
339 (23). Adequate monitoring of social media platforms to confirm and improve the quality of  
340 information delivered to the people is of prime importance (24).

341 Both Nigerians and Egyptians have a good knowledge of the pandemic and have a satisfactory  
342 attitude and perceptions towards the global response. However, we recommend increased  
343 adherence to the health regulations of both countries. Similarly, mental health support should be  
344 made more readily available to the populace. Both governments need to strengthen their health  
345 systems, and improve their surveillance activities, to be able to estimate and detect cases, trace  
346 contacts, properly isolate infected patients, and effectively apply standard infection prevention  
347 and control measures. In addition, they should continuously provide accurate and timely  
348 information to their masses.

## Supporting information

**Table s1:** Descriptive statistics (Correct answer rate) of knowledge of COVID-19 pandemic in Nigeria and Egypt (n = 1437)

**Table s2:** Descriptive statistics (Correct answer rate) of attitude towards preventive measures to COVID-19 pandemic in Nigeria and Egypt (n = 1437).

**Table s3:** Table s3: Descriptive statistics (Correct answer rate) of perception of the global response to COVID-19 pandemic in Nigeria and Egypt

**Table s4:** Table s4: Descriptive statistics (Correct answer rate) of respondents to community response associated with the prevention of a future pandemic.

## Declarations

- Availability of data and materials

The survey instrument and dataset are available as supplementary data.

- Competing interests

The authors declare that they have no competing interests.

- Funding

Not Applicable

- Acknowledgments

We acknowledge Stephanie Germon for validating the survey instrument. We equally acknowledge the dedication of our friends in sharing the questionnaire on social media.

- Authors' contributions

369 EH, AZ and AIA planned the study. EH, OI and AIA contributed equally to the study.

370 All co - authors participated in data collection. EH, OI, OO, and AIA drafted the

371 manuscript. EH, OI, OB, AZ, OO, and AIA did the overall review of the manuscript.

372 All authors read and approved the final study.

## 373 References

- 374 1. World Health Organization. COVID-2019 situation report [Internet]. [cited 11 May  
375 2020]. Available from: [https://www.who.int/docs/default-source/coronaviruse/situation-](https://www.who.int/docs/default-source/coronaviruse/situation-reports/20200215-sitrep-26-covid-19.pdf?sfvrsn=a4cc6787_2)  
376 [reports/20200215-sitrep-26-covid-19.pdf?sfvrsn=a4cc6787\\_2](https://www.who.int/docs/default-source/coronaviruse/situation-reports/20200215-sitrep-26-covid-19.pdf?sfvrsn=a4cc6787_2)
- 377 2. World Health Organization. WHO Director-General's opening remarks at the media  
378 briefing on COVID-19 - 11 March 2020 [Internet]. Who.int. 2020 [cited 1 May  
379 2020]. Available from: [https://www.who.int/dg/speeches/detail/who-director-general-](https://www.who.int/dg/speeches/detail/who-director-general-s-opening-remarks-at-the-media-briefing-on-covid-19---11-march-2020)  
380 [s-opening-remarks-at-the-media-briefing-on-covid-19---11-march-2020](https://www.who.int/dg/speeches/detail/who-director-general-s-opening-remarks-at-the-media-briefing-on-covid-19---11-march-2020)
- 381 3. World Health Organization. Coronavirus disease technical guidance [Internet]. 2020  
382 [cited 14 May 2020]. Available from:  
383 [https://www.who.int/emergencies/diseases/novel-coronavirus-2019/technical-](https://www.who.int/emergencies/diseases/novel-coronavirus-2019/technical-guidance)  
384 [guidance](https://www.who.int/emergencies/diseases/novel-coronavirus-2019/technical-guidance).
- 385 4. Lu H, Stratton C, Tang Y. Outbreak of pneumonia of unknown etiology in Wuhan, China:  
386 The mystery and the miracle. *Journal of Medical Virology*. 2020;92(4):401 - 402.
- 387 5. Hassan S, Sheikh F, Jamal S, Ezeh J, Akhtar A. Coronavirus (COVID-19): A Review of  
388 Clinical Features, Diagnosis, and Treatment. *Cureus*. 2020.
- 389 6. Lin H, Liu W, Gao H, Nie J, Fan Q. Trends in Transmissibility of 2019 Novel  
390 Coronavirus - Infected Pneumonia in Wuhan and 29 Provinces in China. *SSRN Electronic*  
391 *Journal*. 2020.

- 392 7. Huang C, Wang Y, Li X, Ren L, Zhao J, Hu Y et al. Clinical features of patients infected  
393 with 2019 novel coronavirus in Wuhan, China. *The Lancet*. 2020;395(10223):497 - 506.
- 394 8. Carlos W, Dela Cruz C, Cao B, Pasnick S, Jamil S. Novel Wuhan (2019 - nCoV)  
395 Coronavirus. *American Journal of Respiratory and Critical Care Medicine*.  
396 2020;201(4):P7 - P8.
- 397 9. Zhang H, Kang Z, Gong H, Xu D, Wang J, Li Z et al. Digestive system is a potential route  
398 of COVID-19: an analysis of single - cell coexpression pattern of key proteins in viral  
399 entry process. *Gut*. 2020;69(6):1010 - 1018.
- 400 10. Worldometers. Coronavirus Update (Live).  
401 [https://www.worldometers.info/coronavirus/?utm\\_campaign =](https://www.worldometers.info/coronavirus/?utm_campaign=homeAdvegas1%22%20%5C%22countries)  
402 [homeAdvegas1%22%20%5C%22countries](https://www.worldometers.info/coronavirus/?utm_campaign=homeAdvegas1%22%20%5C%22countries). Accessed 12 May 2020.
- 403 11. Bruinen de Bruin Y, Lequarre A, McCourt J, Clevestig P, Pigazzani F, Zare Jeddi M et al.  
404 Initial impacts of global risk mitigation measures taken during the combatting of the  
405 COVID-19 pandemic. *Safety Science*. 2020;128:104773.
- 406 12. Africa CDC. COVID-19 dashboard. <https://africacdc.org/COVID-19/>. Accessed 12 May  
407 2020.
- 408 13. Zhong B, Luo W, Li H, Zhang Q, Liu X, Li W et al. Knowledge, attitudes, and practices  
409 towards COVID-19 among Chinese residents during the rapid rise period of the COVID-  
410 19 outbreak: a quick online cross - sectional survey. *International Journal of Biological*  
411 *Sciences*. 2020;16(10):1745 - 1752.
- 412 14. Gupta N, Singhai M, Garg S, Shah D, Sood V, Singh S. The missing pieces in the jigsaw  
413 and need for cohesive research amidst COVID 19 global response. *Medical Journal*  
414 *Armed Forces India*. 2020.

- 415 15. WMA. World Medical Association Declaration of Helsinki ethical principles for medical  
416 research involving human subjects. *JAMA*, 2013, 310, 2191–2194.
- 417 16. Odetokun I, Akpabio U, Alhaji N, Biobaku K, Oloso N, Ghali - Mohammed I et al.  
418 knowledge of antimicrobial resistance among veterinary students and their personal  
419 antibiotic use practices: A National cross - sectional survey. *Antibiotics*. 2019;8(4):243.
- 420 17. Ohia C, Bakarey A, Ahmad T. COVID-19 and Nigeria: putting the realities in context.  
421 *International Journal of Infectious Diseases*. 2020;95:279 - 281.
- 422 18. World Health Organization. COVID-2019 situation report—26 [Internet]. 2020 [cited 14  
423 May 2020]. Available from: [https://www.who.int/docs/default -  
424 source/coronaviruse/situation - reports/20200215 - sitrep - 26 - COVID-19.pdf?sfvrsn =  
425 a4cc6787\\_2\\_](https://www.who.int/docs/default-source/coronaviruse/situation-reports/20200215-sitrep-26-COVID-19.pdf?sfvrsn=a4cc6787_2_)
- 426 19. Erfani A, Shahriarirad R, Ranjbar K, Mirahmadizadeh A & Moghadami M. Knowledge,  
427 Attitude and Practice toward the Novel Coronavirus (COVID-19) Outbreak: A Population  
428 - Based Survey in Iran. [Preprint]. *Bull World Health Organ*. E - pub: 30 March 2020. doi:  
429 <http://dx.doi.org/10.2471/BLT.20.256651>
- 430 20. Abdelhafiz AS, Mohammed Z, Ibrahim ME, et al. Knowledge, Perceptions, and Attitude  
431 of Egyptians Towards the Novel Coronavirus Disease (COVID-19) [published online  
432 ahead of print, 2020 Apr 21]. *J Community Health*. 2020;1-10. doi:10.1007/s10900-020-  
433 00827-7.
- 434 21. Roy D, Tripathy S, Kar S, Sharma N, Verma S, Kaushal V. Study of knowledge, attitude,  
435 anxiety & perceived mental healthcare need in Indian population during COVID-19  
436 pandemic. *Asian Journal of Psychiatry*. 2020; 51:102083.

- 437 22. Lucero - Priso D, Adebisi Y, Lin X. Current efforts and challenges facing responses to  
 438 2019 - nCoV in Africa. *Global Health Research and Policy*. 2020;5(1).
- 439 23. Koenraadt C, Tuiten W, Scott T, Jones J, Kijchalao U, Sithiprasasna R. Dengue  
 440 knowledge and practices and their impact an aedes aegypti populations in kamphaeng  
 441 phet, Thailand. *The American Journal of Tropical Medicine and Hygiene*. 2006;74(4):692  
 442 - 700.
- 443 24. Finset A, Bosworth H, Butow P, Gulbrandsen P, Hulsman R, Pieterse A et al. Effective  
 444 health communication – a key factor in fighting the COVID-19 pandemic. *Patient  
 445 Education and Counseling*. 2020;103(5):873 - 876.

### Supplementary data

448 Table s1: Descriptive statistics (Correct answer rate) of knowledge of COVID-19  
 449 pandemic in Nigeria and Egypt.

|                                                        |                        |
|--------------------------------------------------------|------------------------|
| 1. Have you heard of the COVID-19                      | No. of respondents (%) |
| Maybe                                                  | 1 (0.07)               |
| No                                                     | 3 (0.21)               |
| Yes                                                    | 1433 (99.72)           |
| Total                                                  | 1437 (100%)            |
| 2. Source of Information                               |                        |
| Friends/family                                         | 350(24.3)              |
| Internet (Social media)                                | 1204 (83.7)            |
| Newspapers                                             | 303 (38.2)             |
| Other sources                                          | 52 (3.6)               |
| TV                                                     | 631 (43.9)             |
| 3. Is COVID-19 the same as the common flu?             |                        |
| I don't know                                           | 94 (6.54)              |
| No                                                     | 1127 (77.87)           |
| Yes                                                    | 216 (15.03)            |
| Total                                                  | 1437 (100)             |
| 4. Is it possible to asymptomatic COVID-19 infections? |                        |
| I don't know                                           | 32 (2.23)              |
| No                                                     | 210 (14.61)            |

|                                               |              |
|-----------------------------------------------|--------------|
| Yes                                           | 1195 (83.16) |
| Total                                         | 1437 (100)   |
| 5. what is the incubation period?             |              |
| 1 - 14 days                                   | 1365 (94.99) |
| 1 - 3 months                                  | 5 (0.35)     |
| 2 - 21 days                                   | 56 (3.9)     |
| I don't know                                  | 11 (0.77)    |
| Total                                         | 1437 (100)   |
| 6. Who can get infected with COVID-19?        |              |
| Anyone can be infected                        | 1422 (98.96) |
| Older people only                             | 8 (0.56)     |
| People with chronic diseases only             | 6 (0.42)     |
| Teenagers and children only                   | 1 (0.07)     |
| Total                                         | 1437 (100)   |
| 7. Symptoms of COVID-19                       |              |
| Bleeding                                      | 69 (4.8)     |
| Dry cough                                     | 1334 (92.8)  |
| Difficulty breathing                          | 1372 (95.4)  |
| Fatigue                                       | 888 (61.8)   |
| Hair loss                                     | 17 (1.1)     |
| Muscle pain                                   | 458 (31.8)   |
| High fever                                    | 1349 (93.8)  |
| Runny nose                                    | 605 (42.1)   |
| 8. Mode of transmission                       |              |
| Air droplets (from patient sneezing/coughing) | 1361 (94.7)  |
| Close contact with people who have the virus  | 1301 (90.5)  |
| Contact with contaminated surfaces            | 1227 (85.3)  |
| Mosquitos/flies bites                         | 5 (0.3)      |
| 9. Viral inactivation                         |              |
| Alcohol - based sanitizers                    | 1330 (92.5)  |
| Clean surfaces with diluted chlorine          | 785 (54.6)   |
| I don't know                                  | 71 (4.9)     |
| Soap/detergents                               | 1163 (80.9)  |
| Water alone                                   | 53 (3.6)     |
| 10. Is handwash important?                    |              |
| Maybe                                         | 2 (0.14)     |
| No                                            | 1 (0.07)     |
| Yes                                           | 1434 (99.79) |
| Total                                         | 1437 (100)   |
| 11. For how long should you wash your hands   |              |
| > 5minutes                                    | 73 (5.08)    |
| 1 minute to 3 minutes                         | 112 (7.79)   |
| 20 seconds to 1 minute                        | 1037 (72.16) |
| 3 minutes to 5 minutes                        | 80 (5.57)    |
| I don't know                                  | 52 (3.62)    |
| Less than 20 seconds                          | 83 (5.78)    |
| Total                                         | 1437 (100)   |



450

451 Table s2 Descriptive statistics (Correct answer rate) of attitude towards preventive measures to  
 452 the COVID-19 pandemic in Nigeria and Egypt.

|           |                                                                            |                               |
|-----------|----------------------------------------------------------------------------|-------------------------------|
| <b>1.</b> | <b>Which is Protective against COVID-19?</b>                               | <b>No. of respondents (%)</b> |
|           | Proper hygiene (handwash/cover mouth and nose during coughing or sneezing) | 1396 (97.1)                   |
|           | Self - Isolation/ Social distancing                                        | 1129 (78.56)                  |
|           | Face masks/gloves                                                          | 1161 (80.8)                   |
|           | Garlic, Onions, and Ginger                                                 | 265 (18.4)                    |
| <b>2.</b> | <b>Who can get infected?</b>                                               |                               |
|           | Everyone                                                                   | 861 (59.9)                    |
|           | People in contact with the ill                                             | 635 (44.2)                    |
|           | Only sick people                                                           | 473 (32.9)                    |
|           | Health workers                                                             | 622 (43.3)                    |
| <b>3.</b> | <b>Does Social distancing can help control COVID-19</b>                    |                               |
|           | I don't know                                                               | 2 (0.14)                      |
|           | No                                                                         | 22 (1.53)                     |
|           | Yes                                                                        | 1381 (96.1)                   |
|           | Maybe                                                                      | 32 (2.23)                     |
|           | Total                                                                      | 1437 (100)                    |
| <b>4.</b> | <b>The ideal distance between people</b>                                   |                               |
|           | >5 meters                                                                  | 122 (8.49)                    |
|           | 1 - 2 meters                                                               | 923 (64.23)                   |
|           | 3 - 5 meters                                                               | 338 (23.52)                   |
|           | I don't know                                                               | 32 (2.23)                     |
|           | Less than 1 meter                                                          | 22 (1.53)                     |
|           | Total                                                                      | 1437 (100)                    |
| <b>5.</b> | <b>Do you follow the COVID-19 recommendations?</b>                         |                               |
|           | No                                                                         | 17 (1.18)                     |
|           | Sometimes                                                                  | 91 (6.33)                     |
|           | Yes                                                                        | 1329 (92.48)                  |
|           | Total                                                                      | 1437 (100)                    |
| <b>6.</b> | <b>If yes, to what extent?</b>                                             |                               |
|           | I do not follow any of the recommendations                                 | 1 (0.07)                      |
|           | I follow all the recommendations                                           | 519 (36.12)                   |
|           | I follow most of them                                                      | 688 (47.88)                   |
|           | I follow some but not all                                                  | 221 (15.38)                   |
|           | Not at all                                                                 | 8 (0.56)                      |
|           | Total                                                                      | 1437 (100)                    |
| <b>7.</b> | <b>Frequency of face touching</b>                                          | 1438                          |
|           | Always                                                                     | 97 (6.75)                     |

|            |                                                         |              |
|------------|---------------------------------------------------------|--------------|
|            | Never                                                   | 62 (4.31)    |
|            | Often                                                   | 294 (20.46)  |
|            | Rarely                                                  | 478 (33.26)  |
|            | Sometimes                                               | 506 (35.21)  |
|            | Total                                                   | 1437 (100)   |
| <b>8.</b>  | <b>How do you feel?</b>                                 |              |
|            | Angry                                                   | 217 (15.1)   |
|            | Bored                                                   | 749 (52.1)   |
|            | Fear                                                    | 634 (44.1)   |
|            | Happy                                                   | 20 (1.39)    |
|            | Having sleep problems                                   | 141 (9.8)    |
|            | Just fine                                               | 186 (12.9)   |
|            | Lonely                                                  | 260 (18)     |
|            | Nervous/Anxious                                         | 681 (47.4)   |
|            | Relaxed/optimistic                                      | 257 (17.8)   |
|            | Stressed                                                | 316 (22)     |
| <b>9.</b>  | <b>How are you adapting?</b>                            |              |
|            | Watching TV/movies                                      | 971 (67.57)  |
|            | Following Social media<br>(Facebook/WhatsApp/Instagram) | 1207 (83.99) |
|            | Volunteering                                            | 184 (12.8)   |
|            | Working from home                                       | 502 (34.93)  |
|            | Practicing indoor sports                                | 372 (25.88)  |
|            | Reading books/magazines                                 | 793 (50.8)   |
|            | Playing Video Games                                     | 167 (11.62)  |
|            | Sleeping all the time                                   | 166 (11.55)  |
|            | Spending time with family                               | 940 (65.41)  |
|            | Fighting with everyone around                           | 7 (0.49)     |
|            | Talking to myself                                       | 155 (10.78)  |
| <b>10.</b> | <b>Stress/worry rating</b>                              |              |
|            | 1                                                       | 181 (12.6)   |
|            | 2                                                       | 269 (18.72)  |
|            | 3                                                       | 552 (38.41)  |
|            | 4                                                       | 248 (17.26)  |
|            | 5                                                       | 187 (13.01)  |
|            | Total                                                   | 1437 (100)   |

453

454

Table s3: Descriptive statistics (Correct answer rate) of perception of the global response to the

455

COVID-19 pandemic in Nigeria and Egypt.

|           |                                                               |                               |
|-----------|---------------------------------------------------------------|-------------------------------|
| <b>1.</b> | <b>Do you think that your government<br/>has done enough?</b> | <b>No. of respondents (%)</b> |
|           | I don't know                                                  | 9 (0.63)                      |
|           | Maybe                                                         | 288 (20.04)                   |
|           | No                                                            | 586 (40.78)                   |

|    |                                                              |              |
|----|--------------------------------------------------------------|--------------|
|    | Yes                                                          | 554 (38.55)  |
|    | Total                                                        | 1437 (100)   |
| 2. | Do you agree with compulsory lockdown?                       |              |
|    | Maybe                                                        | 136 (9.46)   |
|    | No                                                           | 138 (9.6)    |
|    | Yes                                                          | 1163 (80.93) |
|    | Total                                                        | 1437 (100)   |
| 3. | Has WHO done enough?                                         |              |
|    | Maybe                                                        | 367 (25.54)  |
|    | No                                                           | 365 (25.4)   |
|    | Yes                                                          | 705 (49.06)  |
|    | Total                                                        | 1437 (100)   |
| 4. | Your countries response to the pandemic                      |              |
|    | 1                                                            | 246 (17.12)  |
|    | 2                                                            | 341 (23.73)  |
|    | 3                                                            | 523 (36.4)   |
|    | 4                                                            | 226 (15.73)  |
|    | 5                                                            | 101 (7.03)   |
|    | Total                                                        | 1437 (100)   |
| 5. | Rating of the social media coverage of the COVID-19 pandemic |              |
|    | Very satisfied/keeps me updated                              | 702 (48.85)  |
|    | Makes me worry/more stressed                                 | 207 (14.4)   |
|    | Not enough information                                       | 194 (13.5)   |
|    | There are more lies than truth                               | 308 (21.4)   |
|    | I don't follow any media updates                             | 33 (2.29)    |
|    | No comments                                                  | 99 (6.89)    |

456

457 Table s4: Descriptive statistics (Correct answer rate) of respondents to community response  
 458 associated with the prevention of a future pandemic.

|    |                                                         |                        |
|----|---------------------------------------------------------|------------------------|
| 1. | What can a community do to reduce the spread?           | No. of respondents (%) |
|    | Follow/respect the Health recommendations of my country | 1340 (93.24)           |
|    | Eat Healthy/ Practice sports                            | 823 (57.27)            |
|    | Social distancing/Avoid the crowd                       | 1277 (88.86)           |
|    | Volunteer to support whenever possible                  | 731 (50.86)            |
|    | Avoid handshakes and face kissing                       | 1170 (81.41)           |
|    | Attending religious gatherings                          | 21 (1.46)              |
|    | I don't know                                            | 7 (0.49)               |
| 2. | Can we prevent future pandemics?                        |                        |

|                                                                            |              |
|----------------------------------------------------------------------------|--------------|
| I don't know                                                               | 22 (1.53)    |
| Maybe                                                                      | 259 (18.02)  |
| No                                                                         | 211 (14.68)  |
| Yes                                                                        | 945 (65.76)  |
| Total                                                                      | 1437 (100)   |
| 3. Preventing future global pandemic                                       |              |
| Reduce international travels                                               | 472 (32.8)   |
| Establish early alerts and global warning systems for infectious diseases  | 1175 (81.8)  |
| Collaboration between environmental, animal and human health workers       | 912 (63.5)   |
| Intensify research on preventive measures such as vaccines/diagnosis       | 1156 (80.4)  |
| Improve surveillance in the human and animal health sectors                | 1044 (72.65) |
| Raise public awareness of proper hygiene/healthy habits                    | 1030 (71.6)  |
| Prioritize human life/health welfare over the animal or environmental ones | 340 (23.6)   |
| 4. Willingness to share info                                               |              |
| Maybe                                                                      | 86 (5.98)    |
| No                                                                         | 49 (3.41)    |
| Yes                                                                        | 1302 (90.61) |
| Total                                                                      | 1437 (100)   |

459
